# Supplementary material for: Database of Petrophysical Properties of the Mid-German CrystallineHigh
Source: Copernicus journal article supplement (doi:10.5194/essd-2020-211), 2020-09-02

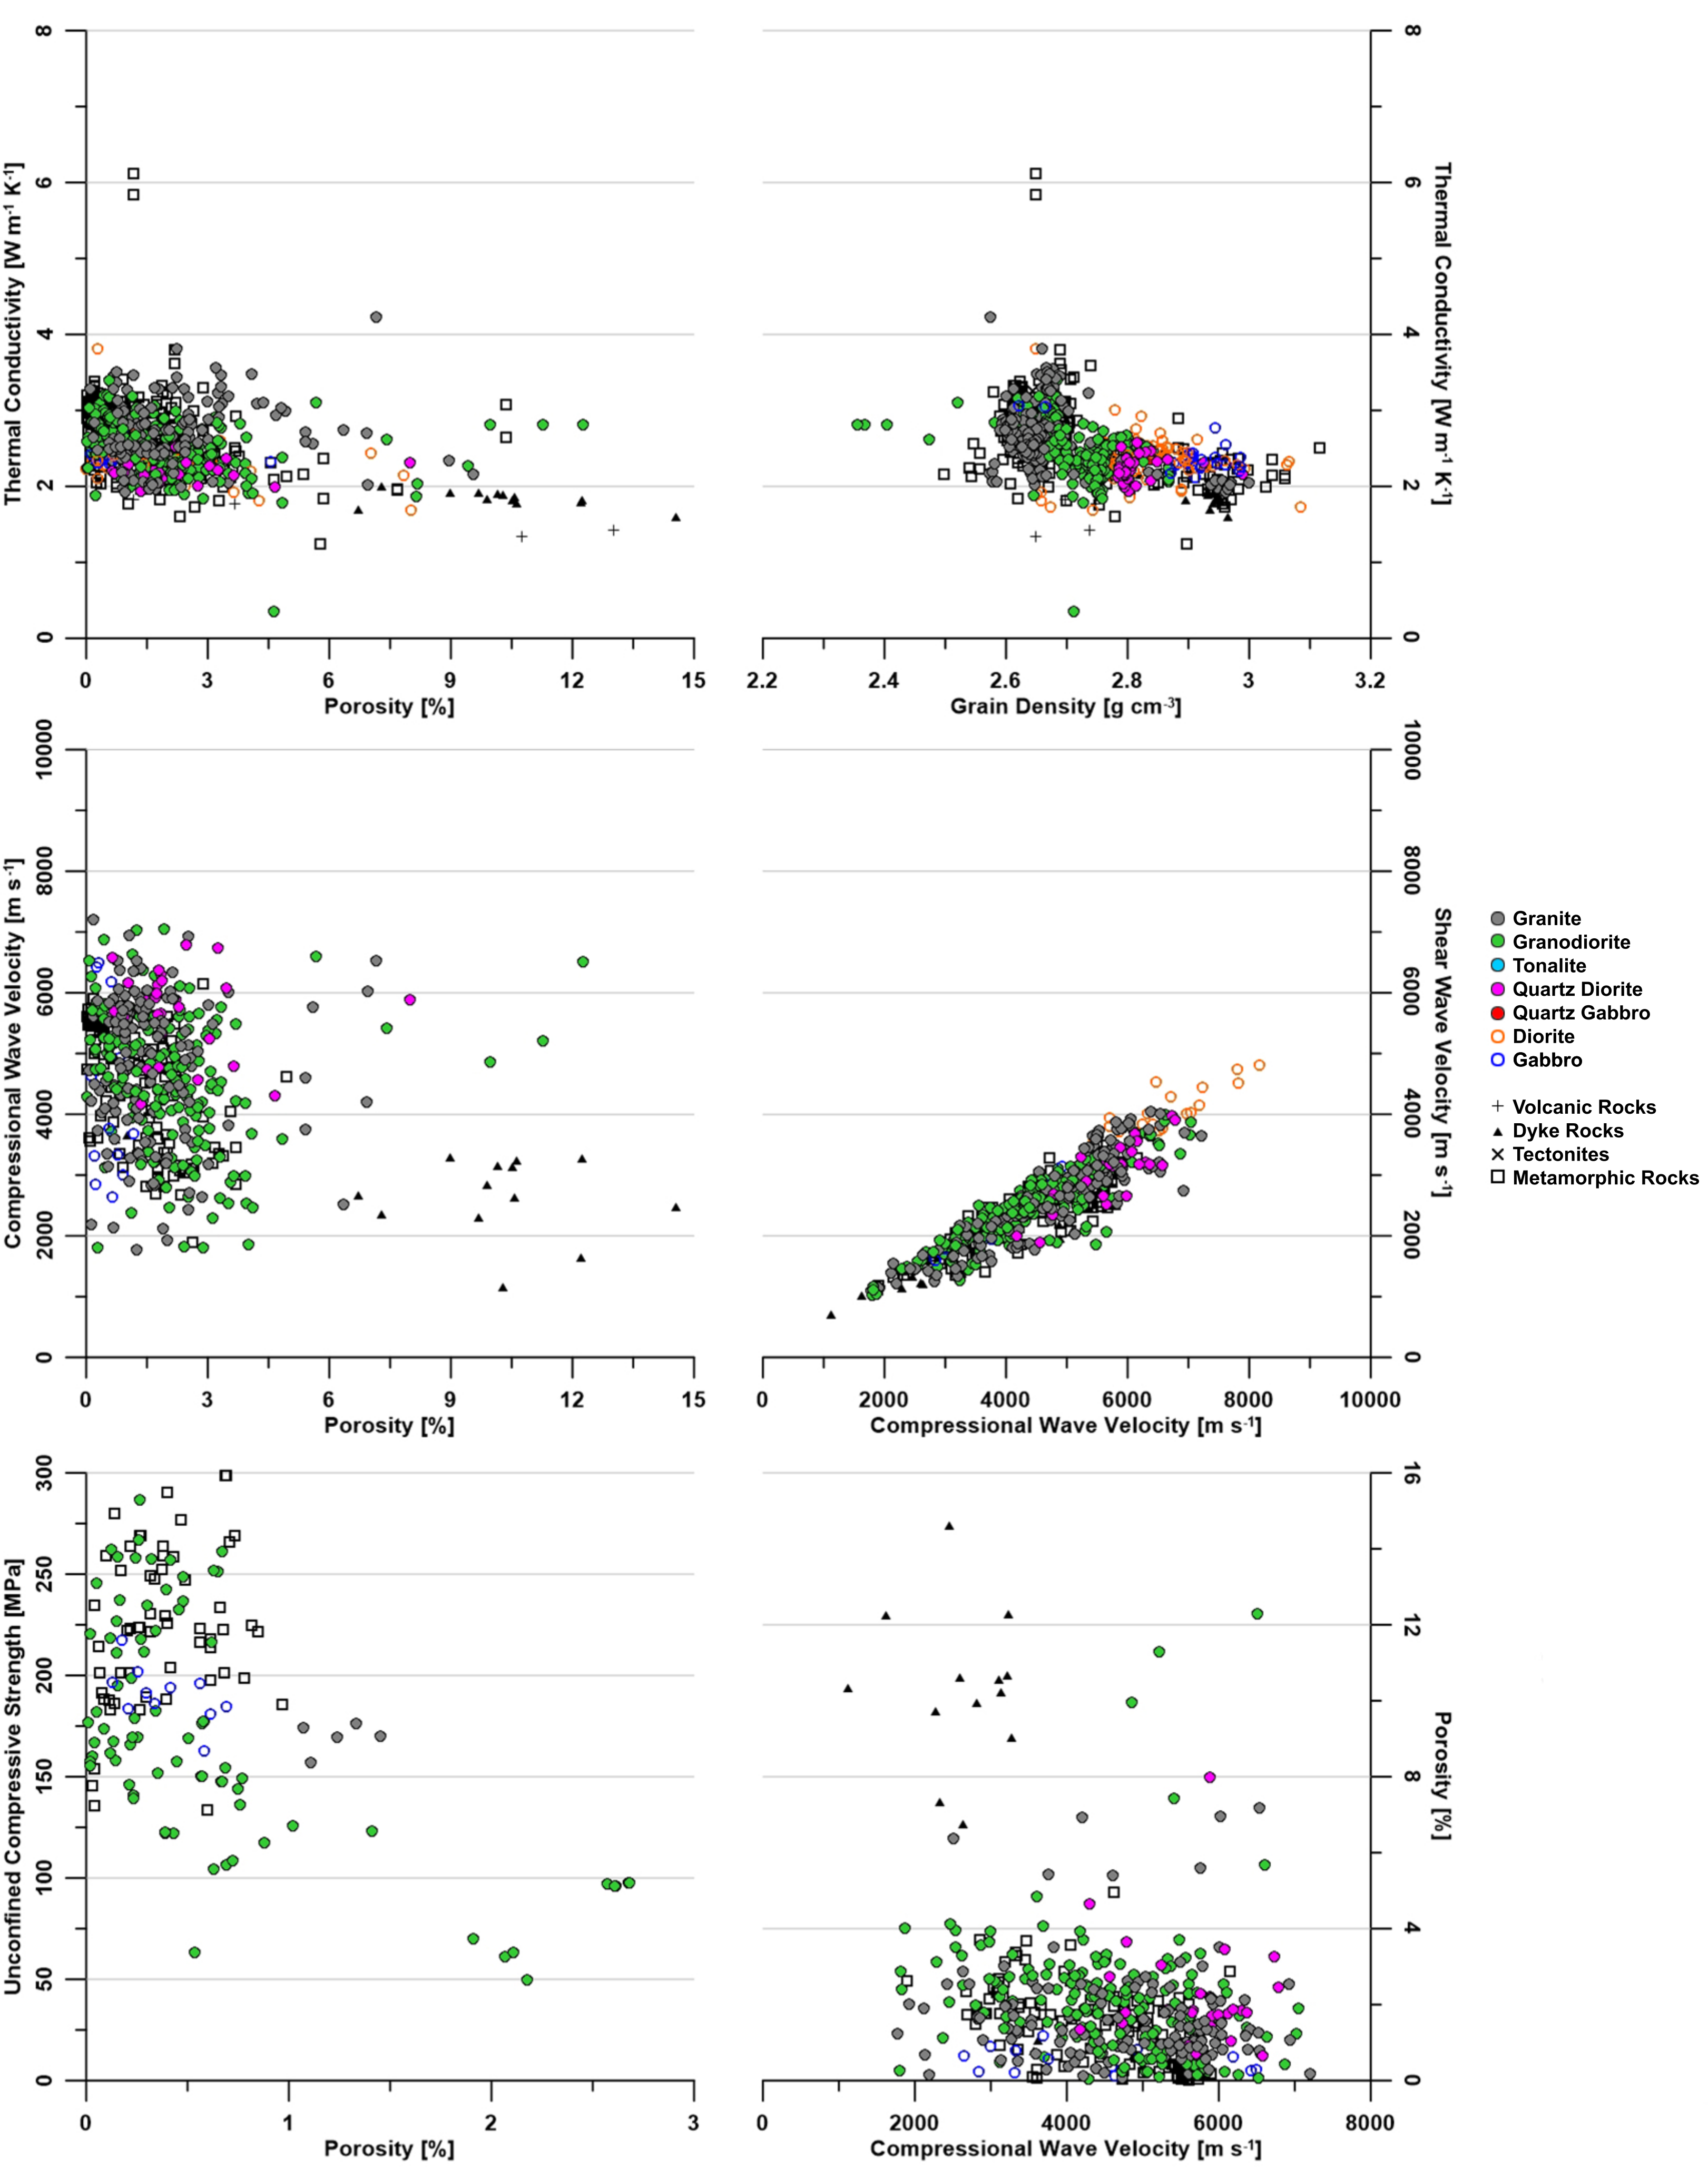

Supplement: Supplementary file [file essd-2020-211-AC2-supplement.pdf]
